# Supplementary material for: Adipsin inhibits Irak2 mitochondrial translocation and improves fatty acid β-oxidation to alleviate diabetic cardiomyopathy
Source: PubMed Central journal article supplement (PMC10712050; doi:10.1186/s40779-023-00493-5), 2023-12-11
Supplement: 40779_2023_493_MOESM1_ESM.pdf [file 40779_2023_493_MOESM1_ESM.pdf]

**Table S1** siRNA sequences for *Irak2* knockdown

| <b>Primer sequence</b> | <b>Monomeric unit</b>  | <b>Melting temperature (°C)</b> | <b>Molecular weight (g/mol)</b> | <b>Primer sequence</b> |
|------------------------|------------------------|---------------------------------|---------------------------------|------------------------|
| <i>siIrak2-01-ss</i>   | GCACCUUUGCCGAUAUCUATT  | 21                              | 53.9                            | 6567.00                |
| <i>siIrak2-01-as</i>   | UAGAUAUCCGGCAAAGGUGCTT | 21                              | 53.9                            | 6733.20                |
| <i>siIrak2-02-ss</i>   | GCAGUCCAGUUUACCUGAATT  | 21                              | 53.9                            | 6630.10                |
| <i>siIrak2-02-as</i>   | UUCAGGUAAACUGGACUGCTT  | 21                              | 53.9                            | 6670.10                |
| <i>siIrak2-03-ss</i>   | GGAAGAUCAAGUCCAUGGATT  | 21                              | 53.9                            | 6756.20                |
| <i>siIrak2-03-as</i>   | UCCAUGGACUUGAUCUUCCTT  | 21                              | 53.9                            | 6544.00                |

**Table S2** Primer sequences for real-time quantitative-PCR

| <b>Gene ID</b> | <b>Gene name</b>                | <b>Primer sequence</b>         | <b>Product length (bp)</b> | <b>Melting temperature (°C)</b> |
|----------------|---------------------------------|--------------------------------|----------------------------|---------------------------------|
| 11537          | <i>Adipsin (Cfd)</i>            | Forward: CCCCAGAGCCGGATTCT     | 165                        | 60.85                           |
|                |                                 | Reverse: AGAGTCGTCATCCGTCCTC   |                            | 58.91                           |
| 108960         | <i>Irak2</i>                    | Forward: TCTCGCCATGGCTTGCTACAT | 161                        | 62.19                           |
|                |                                 | Reverse: GGACCCTCTCCATGGACTTGA |                            | 60.74                           |
| 11461          | <i><math>\beta</math>-actin</i> | Forward: CCACCATGTACCCAGGCATT  | 240                        | 60.03                           |
|                |                                 | Reverse: CAGCTCAGTAACAGTCCGCC  |                            | 60.74                           |

**Table S3** Primary antibodies used for Western blotting, immunoprecipitation, and immunohistochemistry studies

| <b>Antibody</b> | <b>Working dilutions</b> | <b>Catalog No.</b> | <b>Supplier</b>           |
|-----------------|--------------------------|--------------------|---------------------------|
| Adipsin         | WB: 1/1000               | A8117              | ABclonal, Wuhan, China    |
|                 | IHC/IF: 1/200            | Sc-376015          | Santa, California, USA    |
| Irak2           | WB: 1/1000               | A2753              | ABclonal, Wuhan, China    |
|                 | IHC/IP: 1/200            | Bs-1427R           | Bioss, Beijing, China     |
| Opal            | WB: 1/1000               | A9833              | ABclonal, Wuhan, China    |
|                 | IP:1/100                 |                    |                           |
| Phb             | WB: 1/1000               | A0056              | ABclonal, Wuhan, China    |
|                 | IP:1/100                 |                    |                           |
| $\beta$ -actin  | WB: 1/200,000            | AC026              | ABclonal, Wuhan, China    |
| VDAC1           | WB: 1/1000               | MABN504            | Merk, New Jersey, USA     |
| GST-Tag         | WB: 1/1000               | AE006              | ABclonal, Wuhan, China    |
| TF              | WB: 1/1000               | 17435-1-AP         | Proteintech, Wuhan, China |

*Irak2* interleukin-1 receptor-associated kinase-like 2, *Opal* optic atrophy protein 1, *Phb* prohibitin, *VDAC1* voltage-dependent anion channel 1, *GST-Tag* glutathione-S-transferase-tag, *TF* transferrin

**Table S4** Blood glucose and body weight of experimental animals (mean  $\pm$  SD,  $n = 9$ )

| Months | Body weight (g) |                 | Blood glucose (mmol/L) |                 |
|--------|-----------------|-----------------|------------------------|-----------------|
|        | CHD             | HFD             | CHD                    | HFD             |
| 0      | 19.8 $\pm$ 2.1  | 19.2 $\pm$ 1.6  | 6.0 $\pm$ 1.1          | 6.2 $\pm$ 1.4   |
| 1      | 21.4 $\pm$ 1.5  | 21.8 $\pm$ 1.1  | 6.4 $\pm$ 1.0          | 6.8 $\pm$ 1.1   |
| 2      | 23.5 $\pm$ 2.0  | 26.4 $\pm$ 1.2* | 6.7 $\pm$ 1.3          | 6.3 $\pm$ 1.6   |
| 3      | 24.2 $\pm$ 1.6  | 35.7 $\pm$ 1.7* | 6.8 $\pm$ 1.3          | 10.5 $\pm$ 2.1* |
| 4      | 25.6 $\pm$ 1.3  | 44.2 $\pm$ 1.2* | 7.1 $\pm$ 1.4          | 15.6 $\pm$ 1.3* |
| 5      | 26.3 $\pm$ 1.9  | 50.3 $\pm$ 1.0* | 6.3 $\pm$ 1.3          | 20.5 $\pm$ 1.8* |
| 6      | 28.2 $\pm$ 1.2  | 57.7 $\pm$ 1.7* | 7.0 $\pm$ 1.3          | 23.1 $\pm$ 2.1* |

\* $P < 0.05$  vs. CHD; CHD chow diet, HFD high-fat diet

**Table S5** Echocardiographic metrics of experimental animals (mean  $\pm$  SD,  $n = 9$ )

| Item                   | 0 month         |                 | 6 month         |                   |
|------------------------|-----------------|-----------------|-----------------|-------------------|
|                        | CHD             | HFD             | CHD             | HFD               |
| HR (bpm)               | 418 $\pm$ 18    | 415 $\pm$ 10    | 404 $\pm$ 25    | 420 $\pm$ 19      |
| 2D Echo (E/e')         | 24.3 $\pm$ 2.6  | 21.01 $\pm$ 3.3 | 23.1 $\pm$ 5.5  | 56.7 $\pm$ 8.7*   |
| Strain (%)             |                 |                 |                 |                   |
| Circumferential strain | -24.5 $\pm$ 2.6 | -23.2 $\pm$ 3.5 | -25.2 $\pm$ 4.4 | -16.9 $\pm$ 5.3*  |
| Longitudinal strain    | -20.6 $\pm$ 3.5 | -21.2 $\pm$ 4.3 | -19.2 $\pm$ 5.4 | -12.6 $\pm$ 4.12* |
| Radial strain          | 34.2 $\pm$ 1.5  | 33.4 $\pm$ 2.3  | 32.4 $\pm$ 1.72 | 26.62 $\pm$ 1.8*  |

\* $P < 0.05$  vs. CHD; CHD chow diet, HFD high-fat diet, 2D Echo conventional echocardiography, E/e' ratio between mitral inflow and mitral annular excursion velocity during early diastole, Strain strain echocardiography

**Table S6** Mass spectrum analysis of GST-Adipsin-interacting proteins

| <b>Protein name</b> | <b>Unique peptides</b> | <b>Coverage</b> | <b>Molecule weight (kD)</b> | <b>MS score</b> |
|---------------------|------------------------|-----------------|-----------------------------|-----------------|
| Irak2               | 11                     | 89.3            | 69.047                      | 295.09          |
| Hbb-b1              | 9                      | 71.4            | 15.84                       | 282.32          |
| Hba                 | 7                      | 90.8            | 15.085                      | 264.98          |
| Myl2                | 13                     | 76.5            | 18.864                      | 236.95          |
| Myl3                | 13                     | 81.9            | 22.421                      | 174.23          |

Cardiomyocyte proteins interacting with glutathione-S-transferase (GST)-Adipsin, the top 5 with high MS scores. *Irak2* interleukin-1 receptor-associated kinase-like 2, *Hbb-b1* hemoglobin subunit beta-1, *Hba* hemoglobin subunit alpha, *Myl2* myosin regulatory light chain 2, *Myl3* myosin light chain 3, *MS score* mass spectrometry score

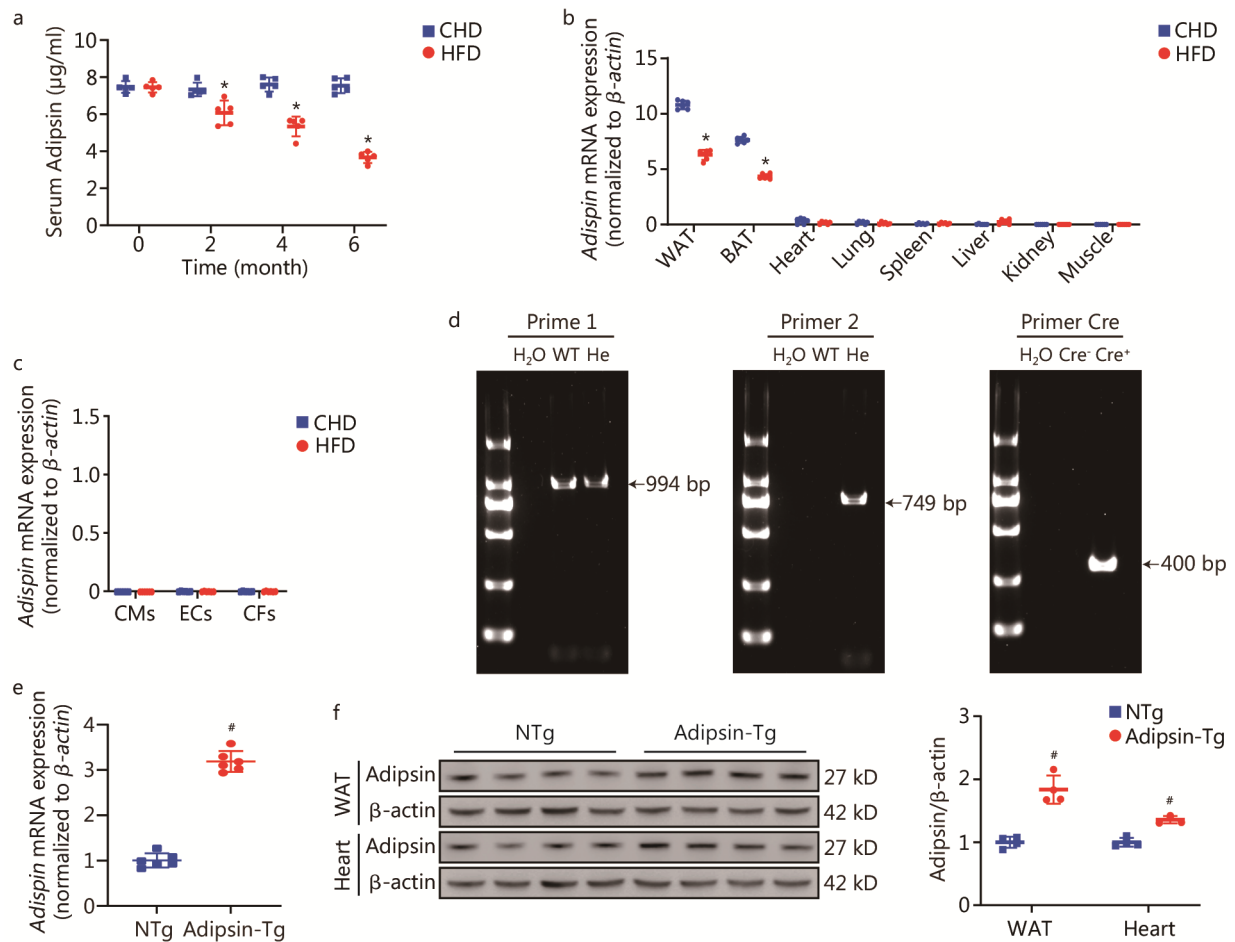

**Fig. S1** Evaluation of Adipsin expression in myocardium and validation of successful construction of Adipsin-Tg mice. **a** ELISA quantitative analysis of serum Adipsin levels in the treatment groups at 0, 2, 4, and 6 months ( $n = 5$ ). **b** Relative *Adipsin* mRNA expression in WAT, interscapular BAT, heart, lung, spleen, liver, kidney, and muscle tissues from mice with CHD- and HFD-fed for 6 months ( $n = 6$ ). **c** Relative *Adipsin* mRNA expression in various cell types in the heart ( $n = 6$ ). **d** Nucleic acid electrophoresis identifying the genotype of transgenic mice. **e** Relative *Adipsin* mRNA expression in Adipsin-Tg and NTg mice ( $n = 6$ ). **f** Western blotting results and quantitative analysis of Adipsin expression in WAT and heart tissue lysates from Adipsin-Tg and NTg mice ( $n = 4$ ). Statistical significance was determined using a two-tailed Student's *t*-test. All data are represented with mean  $\pm$  SD. \* $P < 0.05$  vs. CHD; # $P < 0.05$  vs. NTg; Primer 1: 5'-TCAGATTCTTTTATAGGGGACACA-3' and 3'-TAAAGGCCACTCAATGCTCACTAA-5'; Primer 2: 5'-ACCTCCTCGCCCTTGCT -3' and 3'-GGCGTCTATACCCGAGTGTC-5'; Primer cre: 5'-ATTTGCCTGCATTACCGGTCG-3' and 3'-CAGCATTGCTGCTCACTTGGTC-5'. CHD chow diet, HFD high-fat diet, WAT white adipose tissue, BAT brown adipose tissue, CMs cardiomyocytes, ECs endothelial cells, CFs cardiac

fibroblasts, WT wild type, He heterozygote, Adipsin-Tg Adipsin tissue-specific transgenic mice, NTg nontransgenic mice



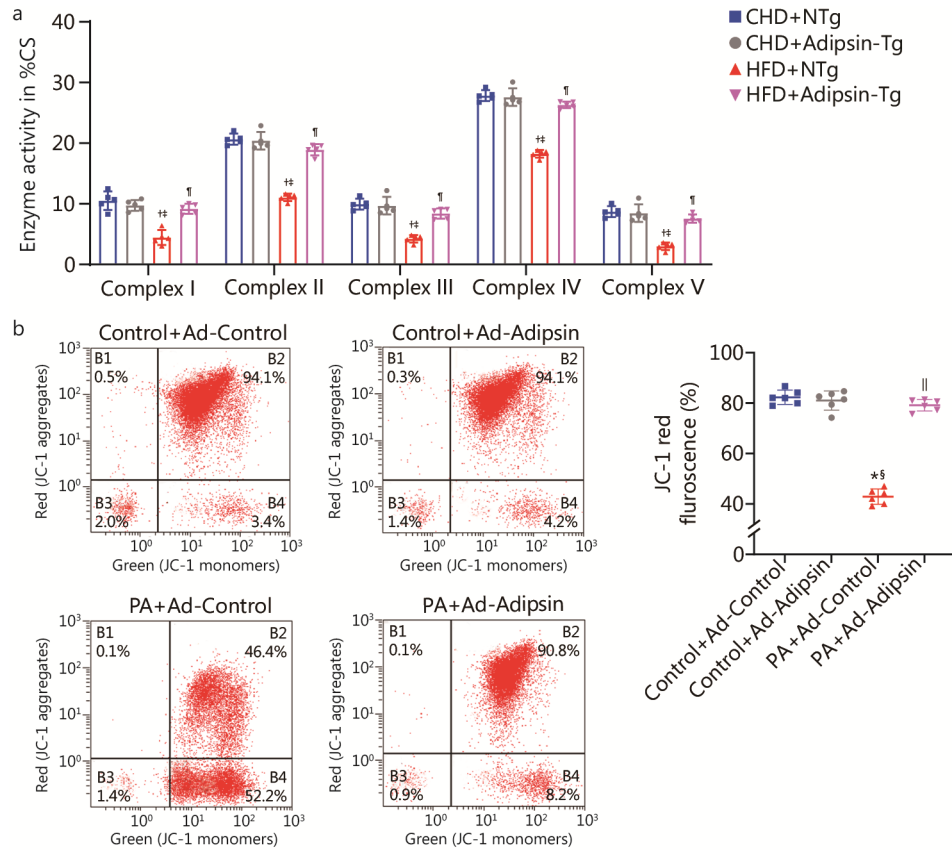

**Fig. S2** Adipsin overexpression improves mitochondrial function in the hearts of DCM. **a** Complex I/II/III/IV/V activities of myocardium in various groups ( $n = 5$ ). **b** Flow cytometry analysis and quantification of mitochondrial membrane potential using JC-1 staining in cardiomyocytes. Red fluorescence intensity was quantified ( $n = 6$  wells). Statistical significance was determined using one-way ANOVA. Data are shown as mean  $\pm$  SD.  $^{\dagger}P < 0.05$  vs. CHD + NTg;  $^{\ddagger}P < 0.05$  vs. CHD + Adipsin-Tg;  $^{\natural}P < 0.05$  vs. HFD + NTg;  $^*P < 0.05$  vs. Control + Ad-Control;  $^{\$}P < 0.05$  vs. Control + Ad-Adipsin;  $^{\parallel}P < 0.05$  vs. PA + Ad-Control. PA palmitate, CHD chow diet, HFD high-fat diet, Adipsin-Tg Adipsin tissue-specific transgenic mice, NTg nontransgenic mice, CS citrate synthase

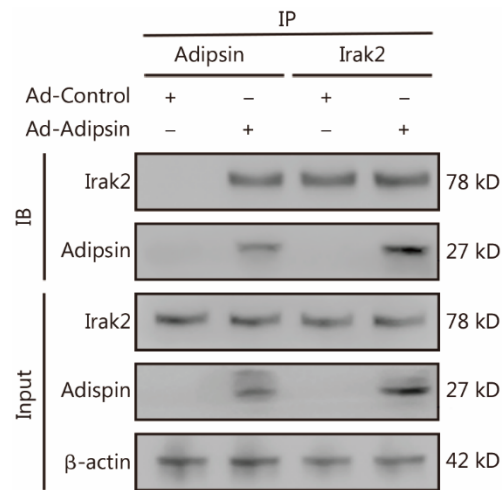

**Fig. S3** Interaction between Adipsin and Irak2 following administration of Ad-Adipsin in cardiomyocytes. IP immunoprecipitation, Irak2 interleukin-1 receptor-associated kinase-like 2, IB immunoblotting

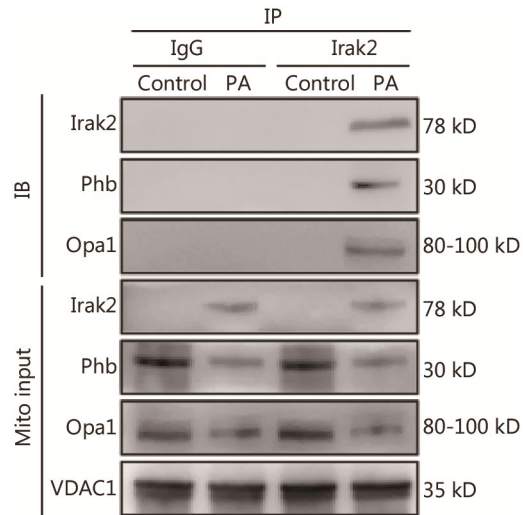

**Fig. S4** Co-IP detected the interaction between Irak2 and Phb-Opa1 in myocardial mitochondria. IP immunoprecipitation, Irak2 interleukin-1 receptor-associated kinase-like 2, Phb prohibitin, Opa1 optic atrophy protein 1, VDAC1 voltage-dependent anion channel 1, Mito mitochondria, IB immunoblotting

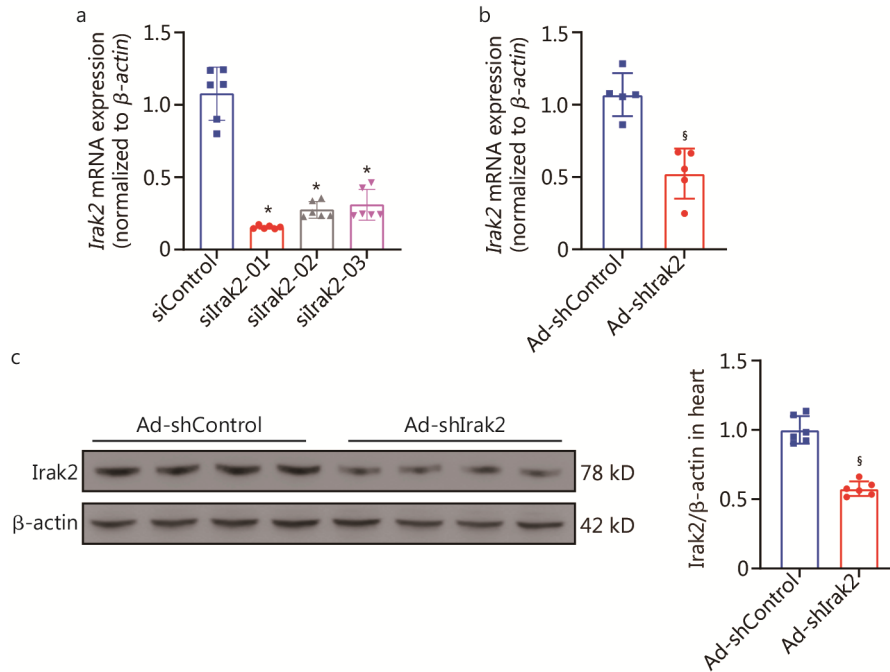

**Fig. S5** Construction of AAV9-shIrak2 and verification of transfection effectiveness. **a** Relative *Irak2* mRNA expression following siIrak2 intervention in cardiomyocytes ( $n = 6$ ). **b** Relative *Irak2* mRNA expression after intervention with Ad-shIrak2 in myocardium ( $n = 6$ ). **c** Western blotting results and quantitative analysis of myocardial *Irak2* expression after intervention with Ad-shIrak2 ( $n = 6$ ). Statistical significance was determined by a two-tailed Student's *t* test. All data are represented with means  $\pm$  SD. \* $P < 0.05$  vs. siControl;  $^{\S}P < 0.05$  vs. Ad-shControl.

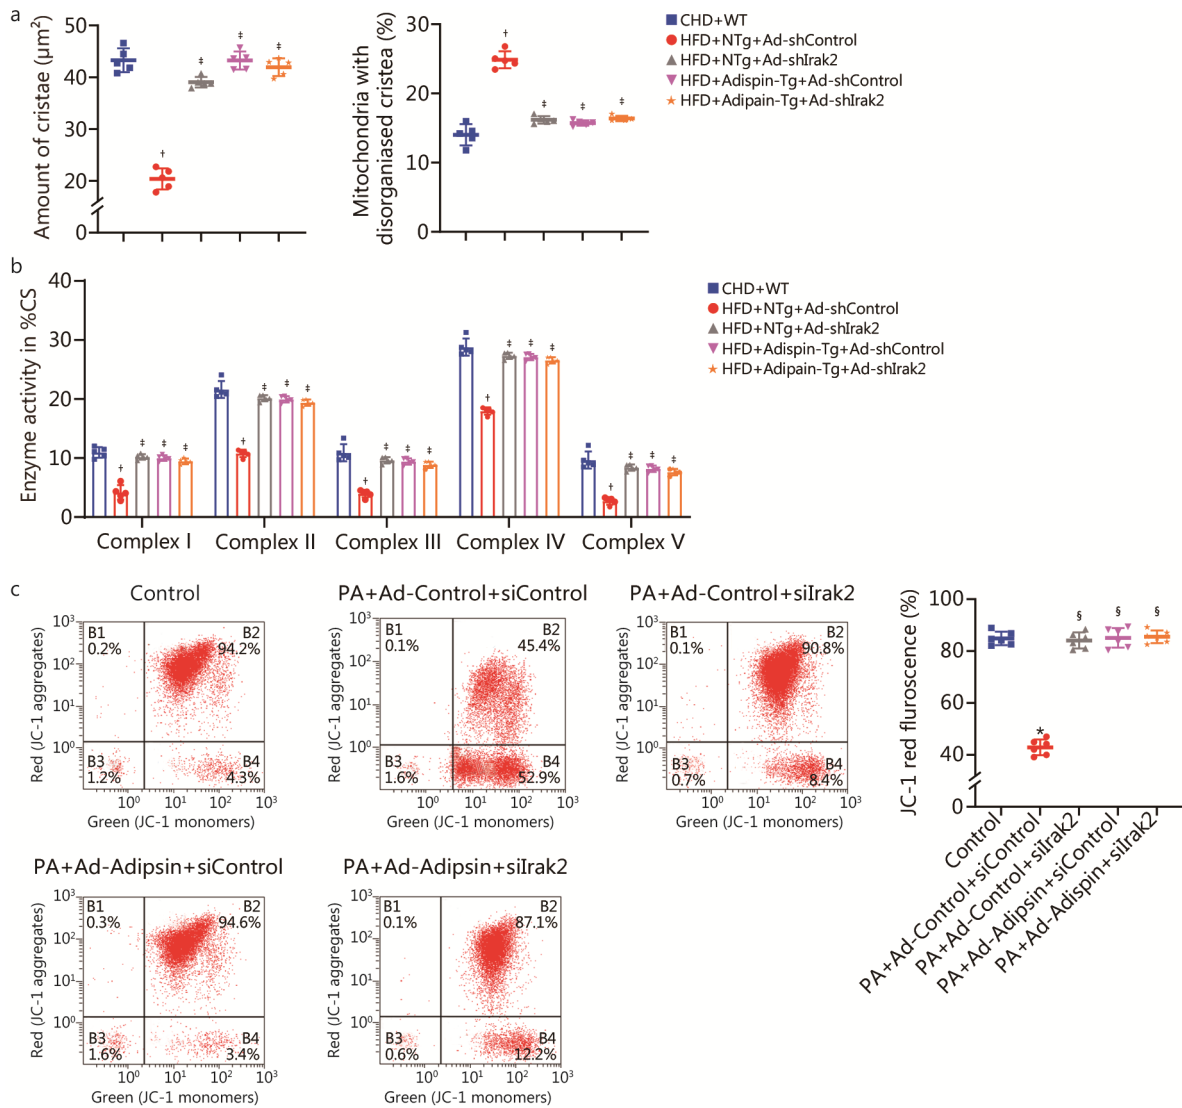

**Fig. S6** Impact of *Irak2* knockdown on Adipsin-Tg induced protective effects of mitochondrial morphology and function. **a** Quantification of cristae amount per  $\mu\text{m}^2$  and the proportion of mitochondria with disorganized cristae ( $n = 5$ ). **b** Complex I/II/III/IV/V activities of myocardium in various groups ( $n = 5$ ). **c** Flow cytometry analysis and quantification of mitochondrial membrane potential by JC-1 staining in cardiomyocytes. Red fluorescence intensity was quantified ( $n = 6$  wells). Statistical significance was determined by one-way ANOVA. Data are shown as mean  $\pm$  SD.  $^\dagger P < 0.05$  vs. CHD+WT;  $^\ddagger P < 0.05$  vs. HFD + NTg + Ad-shControl;  $^* P < 0.05$  vs. Control;  $^\S P < 0.05$  vs. PA + Ad-Control + siControl. PA palmitate, CHD chow diet, HFD high-fat diet, Adipsin-Tg Adipsin tissue-specific transgenic mice, NTg nontransgenic mice, CS citrate synthase, Irak2 interleukin-1 receptor-associated kinase-like 2
